# Supplementary material
Source: PubMed Central journal article supplement (PMC10200310)
Supplement: awac009_supplementary_data.pdf [file awac009_supplementary_data.pdf]

## Supplementary Material

Electronic search strategy:

- Pubmed:
  - Date: 19.03.2020
  - Term: (*(Tics/etiology or Tics/pathology or Tourette Syndrome/etiology or Tourette Syndrome/pathology or tic disorders/etiology or Tic disorders/pathology or secondary tics or Tourettis\*) AND (brain lesion or brain damage or white matter abnormalities or gray matter abnormalities or brain abnormalities or spinal injur\* or spinal lesion\* or brain injur\* or head injur\* or craniocerebral trauma or posttraumatic or post-traumatic or central nervous system infection or wounds and injuries or central nervous system neoplasms or brain metastasis or neurosurgical procedure OR multiple sclerosis or encephalitis or cerebrovascular disorder or intracranial hemorrhage or ischem\* or apoplex\* or insult\* or stroke or nervous system malformation)*)
  - Limitations: none
  - Sorting: Best match
  - Results: 377

Included MeSH-Terms:

*central nervous system infections; tourette syndrome/pathology; intracranial hemorrhages; tics/etiology; head; central nervous system neoplasms; tourette syndrome/etiology; neoplasm metastasis; brain injuries; neurosurgical procedures; multiple sclerosis; gray matter; tics/pathology; tic disorders/pathology; wounds and injuries; leukoaraiosis; congenital abnormalities; cerebrovascular disorders; craniocerebral trauma; brain; encephalitis; nervous system malformations; tic disorders/etiology; tics; stroke*

- Embase:
  - Date: 19.03.2020
  - Term: (*exp tic/et or exp tic/co or exp gilles de la tourette syndrome/et or exp gilles de la tourette syndrome/co or secondary tics.mp. or Tourettis\*.mp.) AND ((exp brain damage/ or exp brain injury/ or exp head injury/ or posttraumatic.mp. or post-traumatic.mp. or (spinal injur\* or spinal lesion\*).mp. or exp white matter injury/ or exp white matter lesion/ or white matter abnormalit\*.mp. or exp central nervous system infection/ or (gray matter lesion\* or gray matter injur\* or gray matter abnormalit\*).mp. or exp brain malformation/ or exp wound/ or exp injury/ or exp central nervous system tumor/ or exp brain metastasis/ or exp neurosurgery/ or exp encephalitis/ or exp cerebrovascular accident/ or exp cerebrovascular disease/ or exp brain hemorrhage/ or (ischem\* or stroke or apoplex\*).mp. or exp nervous system malformation/))*
  - Limitations: none
  - Results: 205

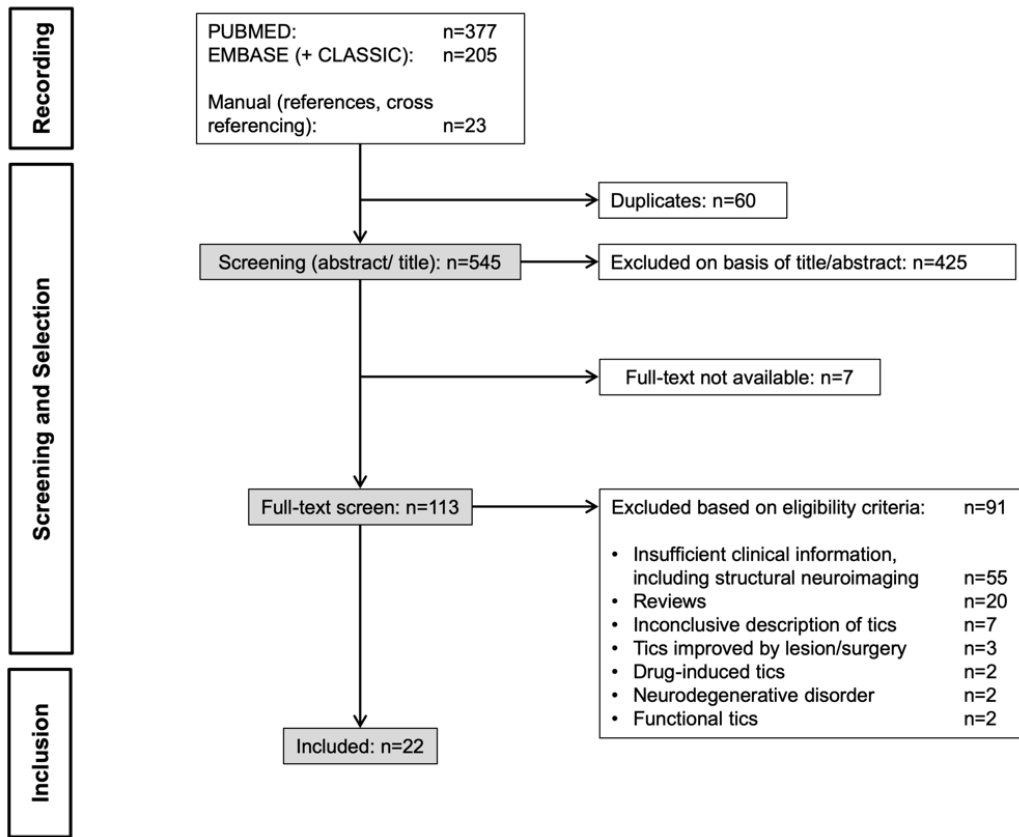

**Supplementary Figure 1 Flow diagram of data acquisition.**

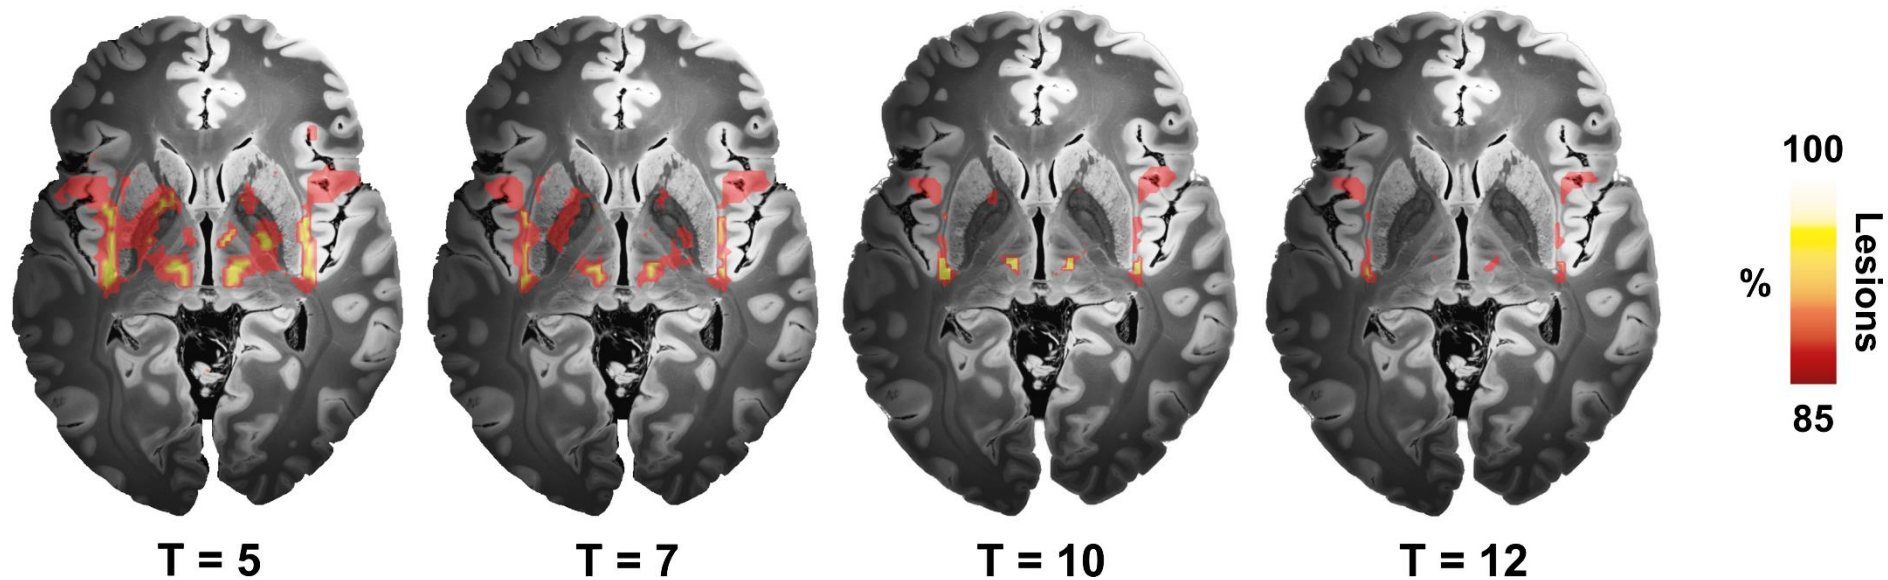

**Supplementary Figure 2 Replication of lesion network map using different T-map thresholds.** T indicates the T-score threshold used to generate different lesion network maps.

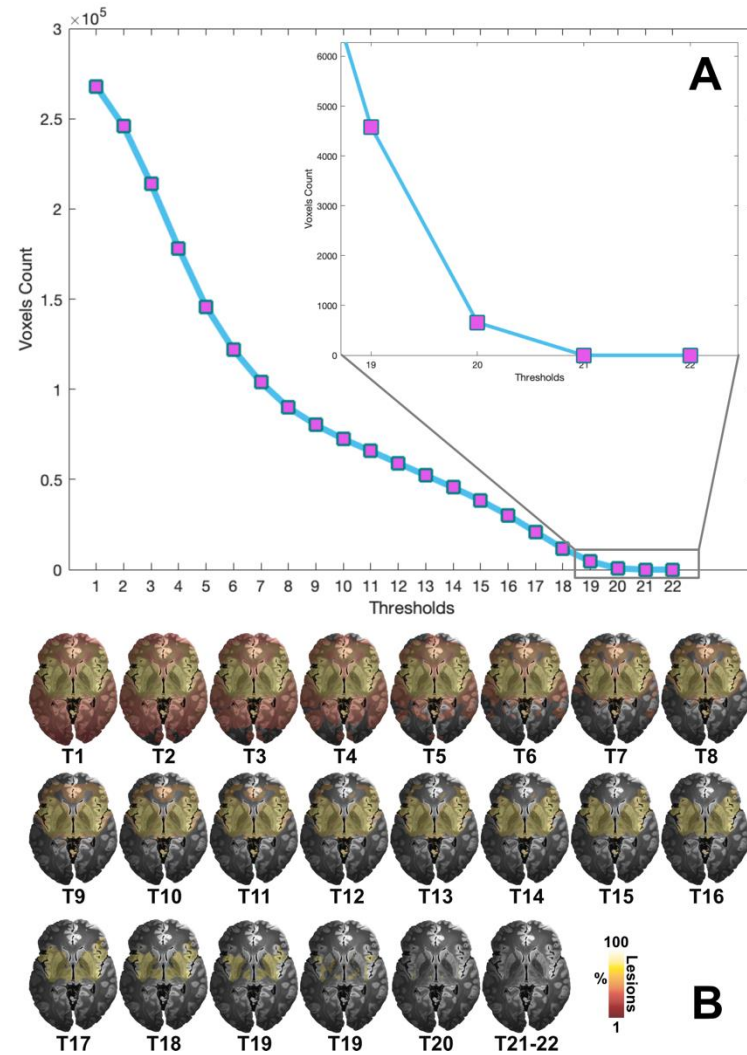

**Supplementary Figure 3** (A) Lesion network map voxel count distribution in different thresholding levels indicated as number of lesions on the x axis. (B) Lesion network maps showing different distribution of voxels surviving the serial thresholding level (T).

**Supplementary Table 1 Clinical characteristics of tic-inducing lesion cases**

| Case Nr/Ref    | Year | Age at lesion confirmation (y)/Age at tic onset (y)/Sex | Latency to tic onset* (months) | Lesion etiology        | Lesion captured [imaging modality]                                                                                                                     | Clinical tic characteristics                                                                                                                                                           | Suppressibility / Urges | Concurrent Movement Disorders <sup>#</sup> | Neuropsychiatric comorbidities                                          | Sources of Funding |
|----------------|------|---------------------------------------------------------|--------------------------------|------------------------|--------------------------------------------------------------------------------------------------------------------------------------------------------|----------------------------------------------------------------------------------------------------------------------------------------------------------------------------------------|-------------------------|--------------------------------------------|-------------------------------------------------------------------------|--------------------|
| 1 <sup>1</sup> | 2011 | 19/20/M                                                 | 12                             | Traumatic brain injury | Scattered lesions in corpus callosum, right putamen capsule, dorsal aspect of mesencephalon and cerebral convexity (grey/white matter interface) [MRI] | Eyelid tics, facial grimacing, clenching fists; sniffing, grunting, throat clearing                                                                                                    | Yes/Yes                 | Ataxia                                     | Impulsivity, Attention and learning difficulties,                       | None reported      |
| 2 <sup>2</sup> | 2002 | 7/8/F                                                   | 15                             | Traumatic brain injury | Lesion of the left putamen, globus pallidus, head of caudate, and internal capsule. [MRI]                                                              | Blinking, shoulder and arm jerks, trunk flexion, echopraxia; grunts, clicking noises, vocalisations, coprolalia, echolalia                                                             | Yes/NA                  | Ataxia                                     | Short attention span, impaired short-term memory, disinhibited behavior | None reported      |
| 3 <sup>3</sup> | 2002 | NA/8.5/M                                                | 6                              | Hemorrhagic stroke     | Lesion of the right putamen and caudate nucleus [MRI]                                                                                                  | Eye blinking, head jerking and shoulder shrugging, blowing air onto palm, compulsive scratching, head nodding, dystonic cervical tics, stretching and thrusting of neck; urge to sniff | Yes/Yes                 | Dystonia                                   | ADHD, OCD, SIB (repetitive scratching)                                  | NA                 |
| 4 <sup>4</sup> | 2008 | 71/71/M                                                 | 0.75                           | Ischemic stroke        | Acute ischemic lesion of left caudate nucleus [MRI]                                                                                                    | Vocalizations (“a”)                                                                                                                                                                    | Yes/Yes                 | None                                       | NA                                                                      | NA                 |
| 5 <sup>5</sup> | 2009 | 73/73/M                                                 | 8                              | Ischemic lesions       | Patchy ischemic lesions in the basal ganglia, periventricular white matter, centrum semiovale [MRI]                                                    | Nose picking, touching his nose, jerks on the legs, jumping up, blowing nose into handkerchief; shouting, startling                                                                    | NA/Yes                  | None                                       | Anxiety, Depression                                                     | NA                 |
| 6 <sup>6</sup> | 2004 | 12/12/M                                                 | 0.4                            | CO-Intoxication        | Caudate nucleus and putamen bilaterally [MRI]                                                                                                          | Repetitive smiling, speech arrest, shoulder shrugging, arm jerking, foot dorsiflexion, throat clearing, humming, lip                                                                   | NA/NA                   | None                                       | NA                                                                      | NA                 |

|                  |      |           |      |                                     |                                                                                                                                                     |                                                                                                                                                                           |         |                                        |                                                                        |                                                              |
|------------------|------|-----------|------|-------------------------------------|-----------------------------------------------------------------------------------------------------------------------------------------------------|---------------------------------------------------------------------------------------------------------------------------------------------------------------------------|---------|----------------------------------------|------------------------------------------------------------------------|--------------------------------------------------------------|
|                  |      |           |      |                                     |                                                                                                                                                     | smacking                                                                                                                                                                  |         |                                        |                                                                        |                                                              |
| 7 <sup>7</sup>   | 2003 | 4.5/4.7/M | 2    | VZV encephalitis                    | Changes of caudate nucleus head and putamen bilaterally, midbrain [MRI]                                                                             | Head extension and flicking, upward eye deviation, nose twitching, shoulder shrugging; grunting, palilalia                                                                | NA/NA   | Tremor                                 | ADHD                                                                   | Support from Action Research and the Barnwood House Trust    |
| 8 <sup>8</sup>   | 1991 | 6/6/F     | 0.5  | Herpes encephalitis                 | Extensive changes of right temporal lobe, basal ganglia and thalamus [CT, MRI]                                                                      | Eye rolling, facial grimacing, head twitching, shoulder shrugging, jumping, touching objects and body parts, making obscene gestures; grunting, sniffing, snorting sounds | Yes/NA  | Possibly dystonia (overflow movements) | Personality changes with emotional lability, anxiety and hyperactivity | Public Health Service Grant Support (NIH NS 27327; HD 25806) |
| 9 <sup>9</sup>   | 2020 | 28/35/M   | 84   | Nail gunshot injury                 | Focal encephalomalacia of left parietal lobe [MRI]                                                                                                  | Head turning; vocalisations (“me”, “boo”), coprolalia                                                                                                                     | Yes/Yes | None                                   | NA                                                                     | None reported                                                |
| 10 <sup>10</sup> | 2012 | 52/52/M   | 10   | Osmotic demyelination syndrome      | Bilateral lesions of caudate nucleus and putamen, central pons and cortical areas, including insular and precentral cortex [MRI]                    | Dystonic tics of neck and shoulders; throat clearing                                                                                                                      | Yes/Yes | Parkinsonism                           | None                                                                   | NA                                                           |
| 11 <sup>11</sup> | 1997 | 33/26/M   | NA   | Traumatic brain injury <sup>@</sup> | Bilateral subcortical and periventricular leukoencephalopathic changes particularly of the frontal and the right temporoparietal white matter [MRI] | Nose rubbing, mouth opening, wringing hand movements, sniffing                                                                                                            | No/No   | None                                   | Irritability, Distractibility, OCD, Depression                         | None reported                                                |
| 12 <sup>12</sup> | 2000 | 16/16/M   | 0.07 | Arteriovenous malformation          | Left frontal arteriovenous malformation [MRI]                                                                                                       | Dystonic head turning, vocalisations (“yeah”)                                                                                                                             | Yes/Yes | None                                   | NA                                                                     | NA                                                           |
| 13 <sup>13</sup> | 1996 | 2/8/F     | NA   | Grade II astrocytoma <sup>^</sup>   | Tumor involvement of optic chiasm, the hypothalamus and thalamus, internal capsule, ventral striatum, fornix,                                       | Blinking, mouth-opening and other facial tics, throat clearing, lyrical vocal tic, adjusting glasses on nose until                                                        | NA/NA   | None                                   | Aggression                                                             | Grant support (MH 49351; MH 18268; MH 30929; NIH             |

|                  |      |         |    |                          |                                                                                                                                                                                                |                                                                                                                                                                                   |         |              |                                                                                                                                                                                                                          |               |                                                                                       |
|------------------|------|---------|----|--------------------------|------------------------------------------------------------------------------------------------------------------------------------------------------------------------------------------------|-----------------------------------------------------------------------------------------------------------------------------------------------------------------------------------|---------|--------------|--------------------------------------------------------------------------------------------------------------------------------------------------------------------------------------------------------------------------|---------------|---------------------------------------------------------------------------------------|
|                  |      |         |    |                          | nucleus accumbens, septal nuclei, amygdala, and midbrain, including the substantia nigra and red nuclei [MRI]                                                                                  | they felt “just right”                                                                                                                                                            |         |              |                                                                                                                                                                                                                          |               | RR 06022;<br>HD 03008;<br>1K20MH012<br>32-01;<br>Tourette<br>Syndrome<br>Association) |
| 14 <sup>14</sup> | 2009 | 30/30/F | NA | Multiple sclerosis       | Lesions in white matter of both cerebral hemispheres, and the right cerebral peduncle, as well as the middle cerebellar peduncles and both thalami [MRI]                                       | Blinking and other facial tics, throat clearing, palilalia, coprolalia                                                                                                            | NA/Yes  | Stereotypies | Restlessness, hyperactivity, mannerisms and stereotypies, poor impulse control, SIB (repetitive scratching)                                                                                                              | NA            |                                                                                       |
| 15 <sup>15</sup> | 2016 | NA/47/M | NA | Hypoxic brain injury     | Bilateral pallidal lesions [MRI]                                                                                                                                                               | Blinking, forehead wrinkling and jaw deviation tics, as well as arm abduction, shoulder lifting and hip twisting tics                                                             | Yes/Yes | None         | None                                                                                                                                                                                                                     | None reported |                                                                                       |
| 16 <sup>16</sup> | 2003 | 12/NA/M | NA | Hypoxic-ischaemic damage | Bilateral lesions of thalamic and infrathalamic structures. Involvement of right midbrain. High-signal lesion in left dorsolateral caudate-putamen, with involvement of internal capsule [MRI] | Blinking, grimacing and other facial tics, head jerks, body rocking, sounds and noises, including throat clearing, whistling, reiterative speech, as well as echo- and coprolalia | Yes/NA  | Dystonia     | Restricted social interaction, unusual preoccupations, fixed interests and rigid insistence. Inattentive, impulsive, violent outbursts. SIB (scratching, punching himself on abdomen and legs). Compulsive masturbation. | NA            |                                                                                       |
| 17 <sup>17</sup> | 2002 | 34/34/F | NA | Multiple sclerosis       | Lesions in the periventricular white matter, thalamus, basal ganglia and brainstem [MRI]                                                                                                       | Throat clearing                                                                                                                                                                   | Yes/No  | None         | Fatigue                                                                                                                                                                                                                  | NA            |                                                                                       |

|                  |      |         |    |                                  |                                                                                                                                                                                                           |                                                                                                                                                          |         |                        |                         |                                                                                                                   |
|------------------|------|---------|----|----------------------------------|-----------------------------------------------------------------------------------------------------------------------------------------------------------------------------------------------------------|----------------------------------------------------------------------------------------------------------------------------------------------------------|---------|------------------------|-------------------------|-------------------------------------------------------------------------------------------------------------------|
| 18 <sup>18</sup> | 1999 | 11/6/M  | NA | Cystic malformations             | Multiple cystic areas in the left gyrus rectus and superior frontal gyrus [MRI]                                                                                                                           | Eye and facial tics, vocalizations                                                                                                                       | NA/NA   | None                   | No                      | NA                                                                                                                |
| 19 <sup>19</sup> | 2007 | NA/NA/F | NA | Autoimmune encephalitis          | Abnormal signal change in striatum bilaterally [MRI]                                                                                                                                                      | NA                                                                                                                                                       | NA/NA   | Parkinsonism, Dystonia | OCB, Anxiety, Dysthymia | Tourette Syndrome Association; Sophie Cameron Trust; Action Research; NHS Trust; Marie Curie Training Fellowship) |
| 20 <sup>20</sup> | 2004 | 34/27/F | 1  | CO-Intoxication                  | Bilateral pallidal changes [MRI]                                                                                                                                                                          | Facial tics with mouth opening, lateral jaw movements, neck twisting and shoulder shrugging.                                                             | Yes/Yes | None                   | NA                      | NA                                                                                                                |
| 21 <sup>21</sup> | 1986 | 24/6/F  | NA | Porencephalic cyst               | Porencephalic cyst in right temporal lobe with involvement of basal ganglia structures [CT]                                                                                                               | Tics of eyelids and mouth, and tongue protrusion tics. Head and shoulder tics. Diaphragmatic tics, coughs, grunting and vocalizations, including screams | NA/NA   | None                   | NA                      | NA                                                                                                                |
| 22 <sup>22</sup> | 2016 | 16/16/M | NA | Acute necrotizing encephalopathy | Symmetrical T2-hyperintense lesions involving the basal ganglia (caudate, putamen and globus pallidus) and the thalami. Additional highly symmetrical white matter changes in the centrum semiovale [MRI] | Motor and vocal tics. Palilalia                                                                                                                          | NA/NA   | Parkinsonism           | ADHD, OCD, Tachygraphia | None reported                                                                                                     |

\* from lesioning event to tic onset; # = including cerebellar signs; @ = Case 3 of the 3 reported. ^ = Case 1 of 3 reported. NA = Not Available, ADHD = Attention Deficit Hyperactivity Disorder, OCB/D = Obsessive Compulsive Behaviour/Disorder



## Reference:

1. Ranjan N, Nair KP, Romanoski C, Singh R, Venketswara G. Tics after traumatic brain injury. *Brain Inj.* 2011;25:629-633.
2. Majumdar A, Appleton RE. Delayed and severe but transient Tourette syndrome after head injury. *Pediatr Neurol.* 2002;27:314-317.
3. Kwak CH, Jankovic J. Tourettism and dystonia after subcortical stroke. *Mov Disord.* 2002;17:821-825.
4. Gomis M, Puente V, Pont-Sunyer C, Oliveras C, Roquer J. Adult onset simple phonic tic after caudate stroke. *Mov Disord.* 2008;23:765-766.
5. Topçuoğlu V, Arman AR, Yazgan C, Arman A, Gönentür AG, Bicer DS. Tourettism in a 73 Year Old Man After Coronary Artery Bypass Surgery. 2009.
6. Alioglu Z, Boz C, Sari A, Aynaci M. Transient tic disorder following carbon monoxide poisoning. *J Neuroradiol.* 2004;31:231-233.
7. Dale RC, Church AJ, Heyman I. Striatal encephalitis after varicella zoster infection complicated by Tourettism. *Mov Disord.* 2003;18:1554-1556.
8. Northam RS, Singer HS. Postencephalitic acquired Tourette-like syndrome in a child. *Neurology.* 1991;41:592-593.
9. de Souza A. New-onset tic disorder following circumscribed brain injury. *J Clin Neurosci.* 2020;75:234-239.
10. Jung NY, Lee JH. Secondary tics after osmotic demyelination syndrome involving both the striatum and the cerebral cortex. *J Clin Neurosci.* 2012;19:179-180.
11. Krauss JK, Jankovic J. Tics secondary to craniocerebral trauma. *Mov Disord.* 1997;12:776-782.
12. Yochelson MR, David RG. New-onset tic disorder following acute hemorrhage of an arteriovenous malformation. *J Child Neurol.* 2000;15:769-771.
13. Peterson BS, Bronen RA, Duncan CC. Three cases of symptom change in Tourette's syndrome and obsessive-compulsive disorder associated with paediatric cerebral malignancies. *J Neurol Neurosurg Psychiatry.* 1996;61:497-505.
14. Nociti V, Fasano A, Bentivoglio AR, et al. Tourettism in multiple sclerosis: a case report. *J Neurol Sci.* 2009;287:288-290.
15. Criscuolo C, D'Amico A, Peluso S, Popolizio T, Pellecchia MT. Adult-onset pure tic disorder after post-traumatic hypoxic lesions of the globus pallidus. *Parkinsonism & related disorders.* 2017;34:75-76.
16. Berthier ML, Kulisevsky J, Asenjo B, Aparicio J, Lara D. Comorbid Asperger and Tourette syndromes with localized mesencephalic, infrathalamic, thalamic, and striatal damage. *Dev Med Child Neurol.* 2003;45:207-212.

17. Lana-Peixoto MA, Teixeira AL, Brazilian Committee for T, Research in Multiple S. Simple phonic tic in multiple sclerosis. *Mult Scler.* 2002;8:510-511.
18. McAbee GN, Wark JE, Manning A. Tourette syndrome associated with unilateral cystic changes in the gyrus rectus. *Pediatr Neurol.* 1999;20:322-324.
19. Martino D, Church A, Giovannoni G. Are antibasal ganglia antibodies important, and clinically useful? *Pract Neurol.* 2007;7:32-41.
20. Ko SB, Ahn TB, Kim JM, Kim Y, Jeon BS. A case of adult onset tic disorder following carbon monoxide intoxication. *Can J Neurol Sci.* 2004;31:268-270.
21. Kjaer M, Boris P, Hansen LG. Abnormal CT scan in a patient with Gilles de la Tourette syndrome. *Neuroradiology.* 1986;28:362-363.
22. Boca M, Lloyd K, Likeman M, Jardine P, Whone A. Basal ganglia necrosis: a 'best-fit' approach. *Pract Neurol.* 2016;16:458-461.
